# Supplementary material for: PdO/SnO2 heterostructure for low-temperature detection of CO with fast response and recovery
Source: Royal Society of Chemistry journal article supplement (doi:10.1039/c9ra03171e), 2019-01-01
Supplement: c9ra03171e1.pdf [file c9ra03171e1.pdf]

## Support Information

### **PdO/SnO<sub>2</sub> Heterostructure for Low-Temperature Detection of CO with Fast Response and Recovery**

*Pengjian Wang<sup>ab#</sup>, Tingbiao Yuan<sup>b#</sup>, Huifang Yuan<sup>a</sup>, Xiaoyan Zheng<sup>\*a</sup>, Hamza Ijaz<sup>b</sup>, Junfeng Hui<sup>a</sup>, Daidi Fan<sup>a</sup>, , Yuxin Zhao<sup>\*c</sup> and Shi Hu<sup>\*b</sup>*

*a. Shaanxi Key Laboratory of Degradable Biomedical Materials, Shanxi R&D Center of Biomaterials and Fermentation Engineering, School of Chemical and Engineering, Northwest University, Xian, Shaanxi, 710069, P.R.China*

*b. Department of Chemistry, School of Science, Tianjin Key Laboratory of Molecular Optoelectronic Science, Tianjin University, Tianjin 300072, China.*

*c. Xi'an Jiaotong University, School of Chemical Engineering and Technology, Xian, Shannxi 710049, China*

*#. These authors contributed equally to this work.*

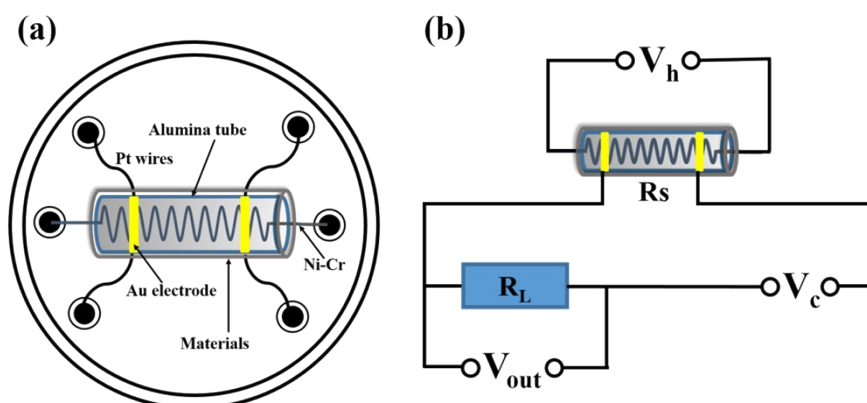

Figure S1. (a) Schematic of the heating and measurement setup for gas sensor; (b) Schematic of the electric circuit for the gas sensing measurement.

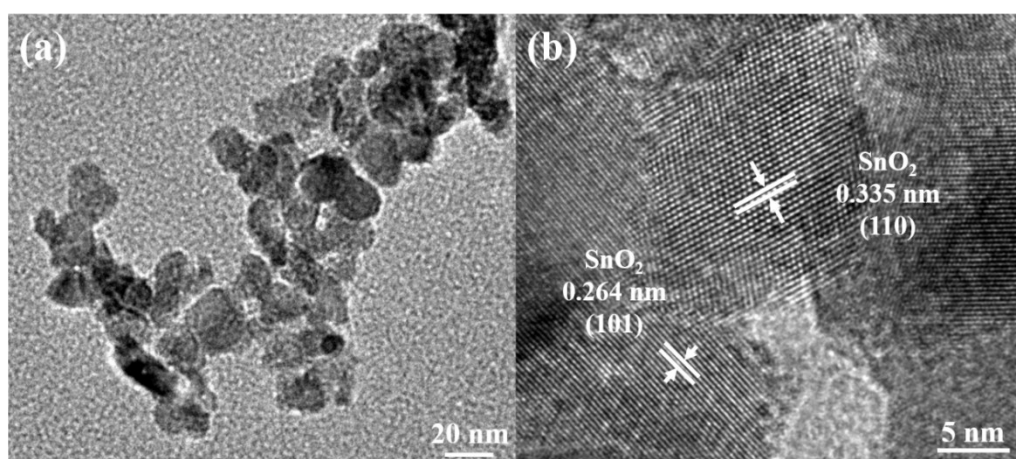

Figure S2. (a-b) TEM of  $\text{SnO}_2$

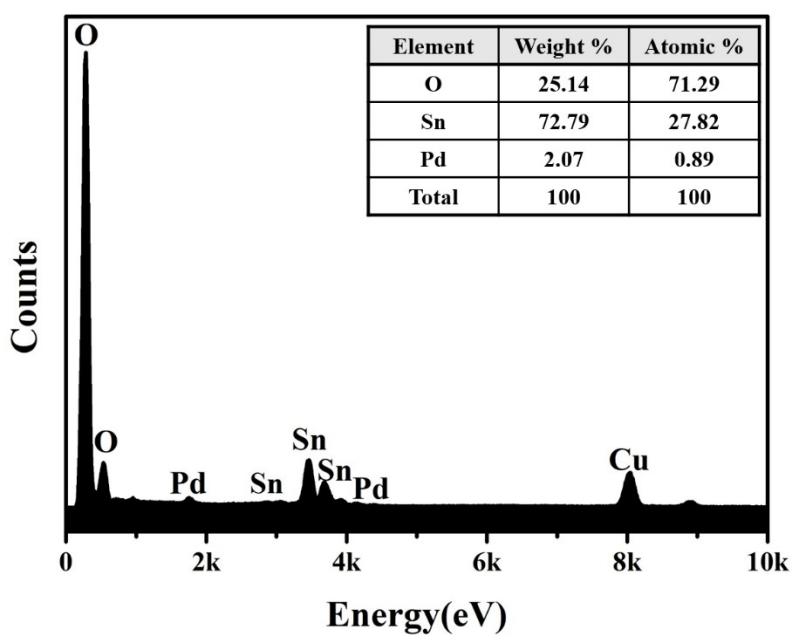

Figure S3. The EDS spectra of PdO/SnO<sub>2</sub>.

Table S1 Baseline resistance and Response resistance of PdO/SnO<sub>2</sub> and SnO<sub>2</sub>.

|        | Pd/SnO <sub>2</sub>      |                          | SnO <sub>2</sub>         |                          |
|--------|--------------------------|--------------------------|--------------------------|--------------------------|
| T (°C) | Baseline Resistance (KΩ) | Response Resistance (KΩ) | Baseline Resistance (KΩ) | Response Resistance (KΩ) |
| 80     | 78046.48                 | 26343.59                 | 561.429                  | 502.821                  |
| 100    | 18723.87                 | 3504.374                 | 20.931                   | 20.849                   |
| 160    | 6062.147                 | 1508.151                 | 5.112                    | 4.827                    |
| 200    | 3235.493                 | 1168.257                 | 6.252                    | 5.627                    |
| 240    | 2337.784                 | 1126.302                 | 5.301                    | 4.65                     |
| 260    | 2765.060                 | 1238.138                 | 4.787                    | 3.757                    |
| 300    | 3995.005                 | 1836.075                 | 5.105                    | 3.660                    |
| 340    | 3531.038                 | 1717.391                 | 6.831                    | 3.812                    |

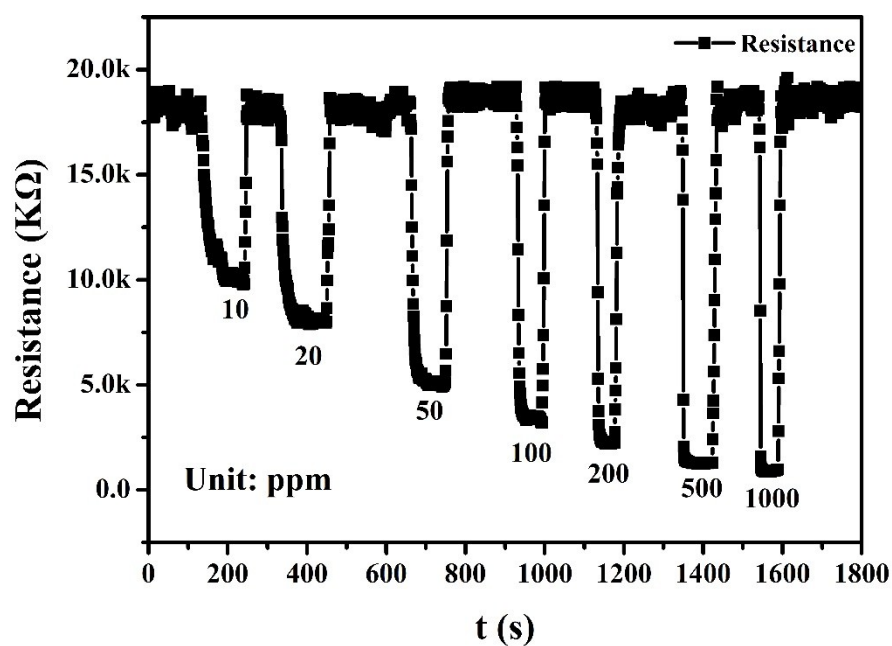

Figure S4. Resistance curve of PdO/SnO<sub>2</sub> to various concentrations of CO gas ranging from 10 ppm to 1000 ppm.

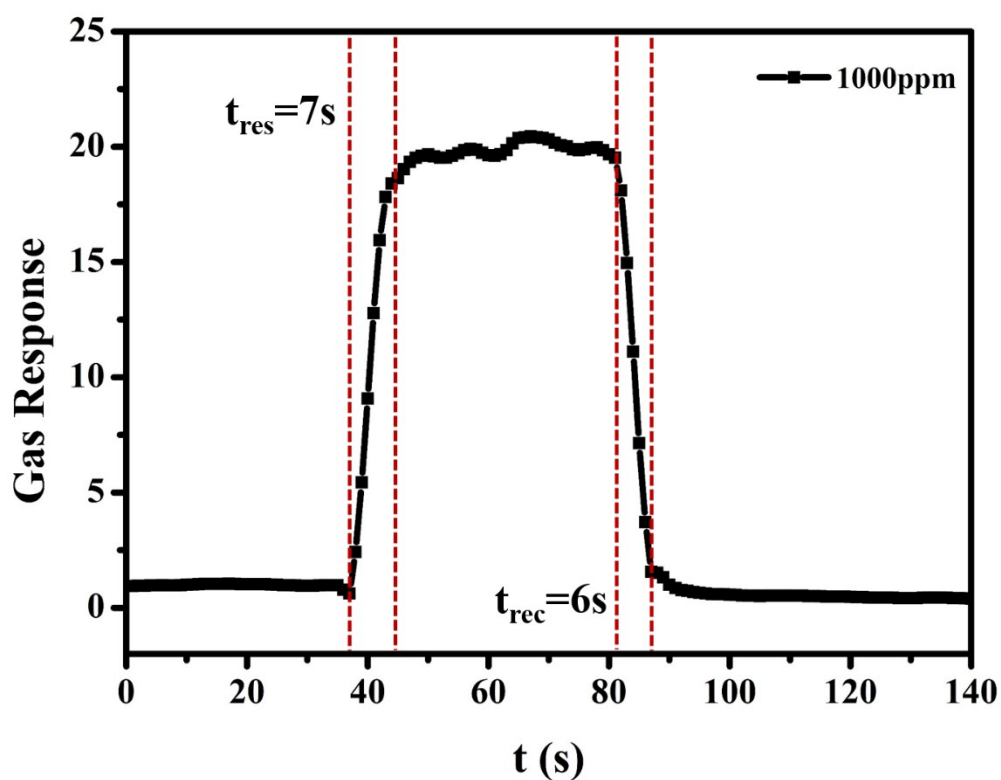

Figure S5. Real-time gas sensing transients of the sensor based on PdO/SnO<sub>2</sub> to 1000 ppm CO at 100 °C

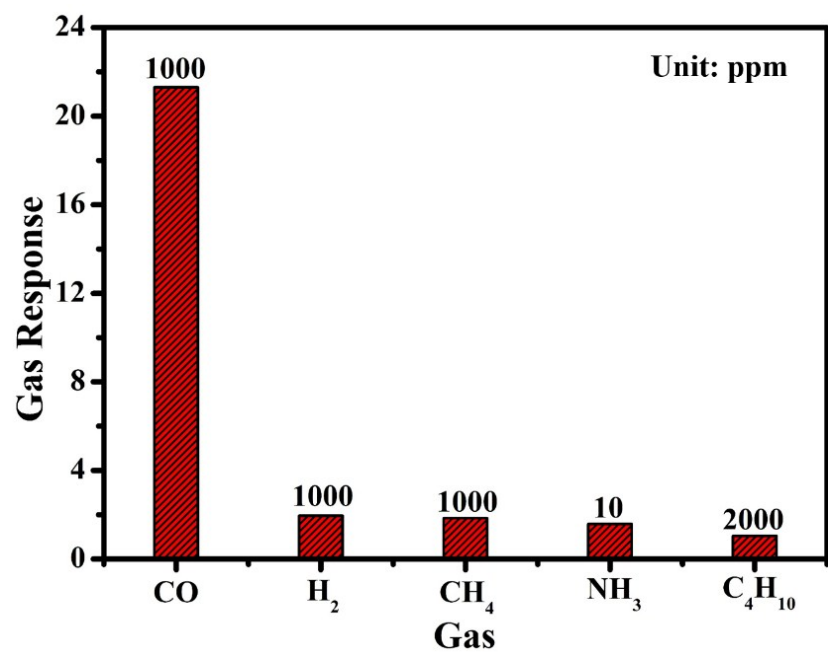

Figure S6. Selectivity of PdO/SnO<sub>2</sub> to several gases at 100 °C

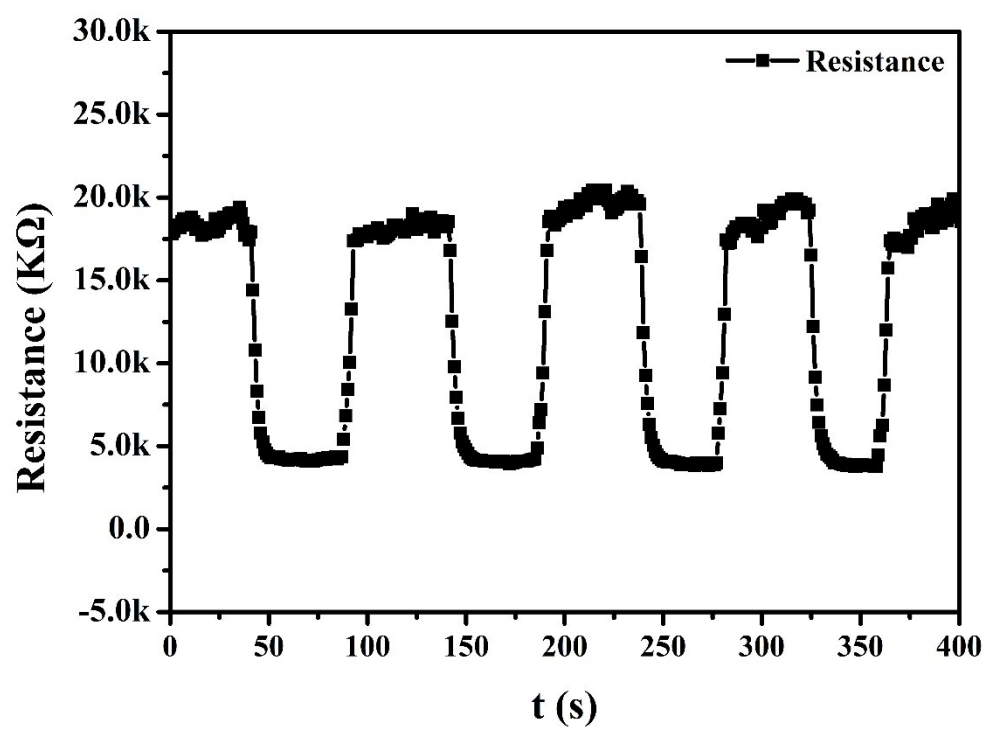

Figure S7. Four periods of resistance curve of the sensor to 100 ppm CO at 100 °C
